# Supplementary material
Source: Springer Nature journal article supplement (https://www.springermedizin.de/resource/supplementary/12955_2012_1091_MOESM3_ESM.pdf/9559212)

**Figure 1b. Score distributions for WEMWBS in Pakistani Samples (Birmingham and Coventry combined)**

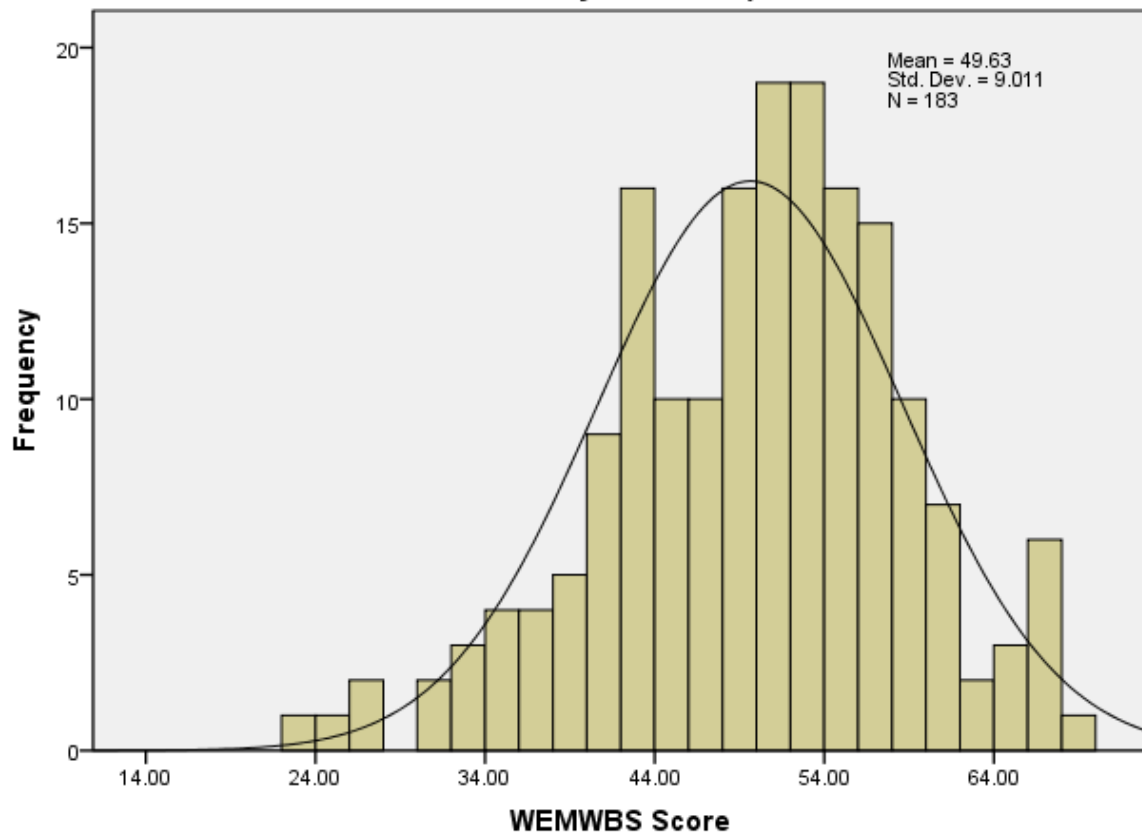

Supplement: MOESM3 [file 9559212]
